# Supplementary material
Source: publisher figshare collection journal article supplement (https://karger.figshare.com/ndownloader/files/20152883)
Supplement: Supplementary file 1 [file 20152883]

**Supplementary material**


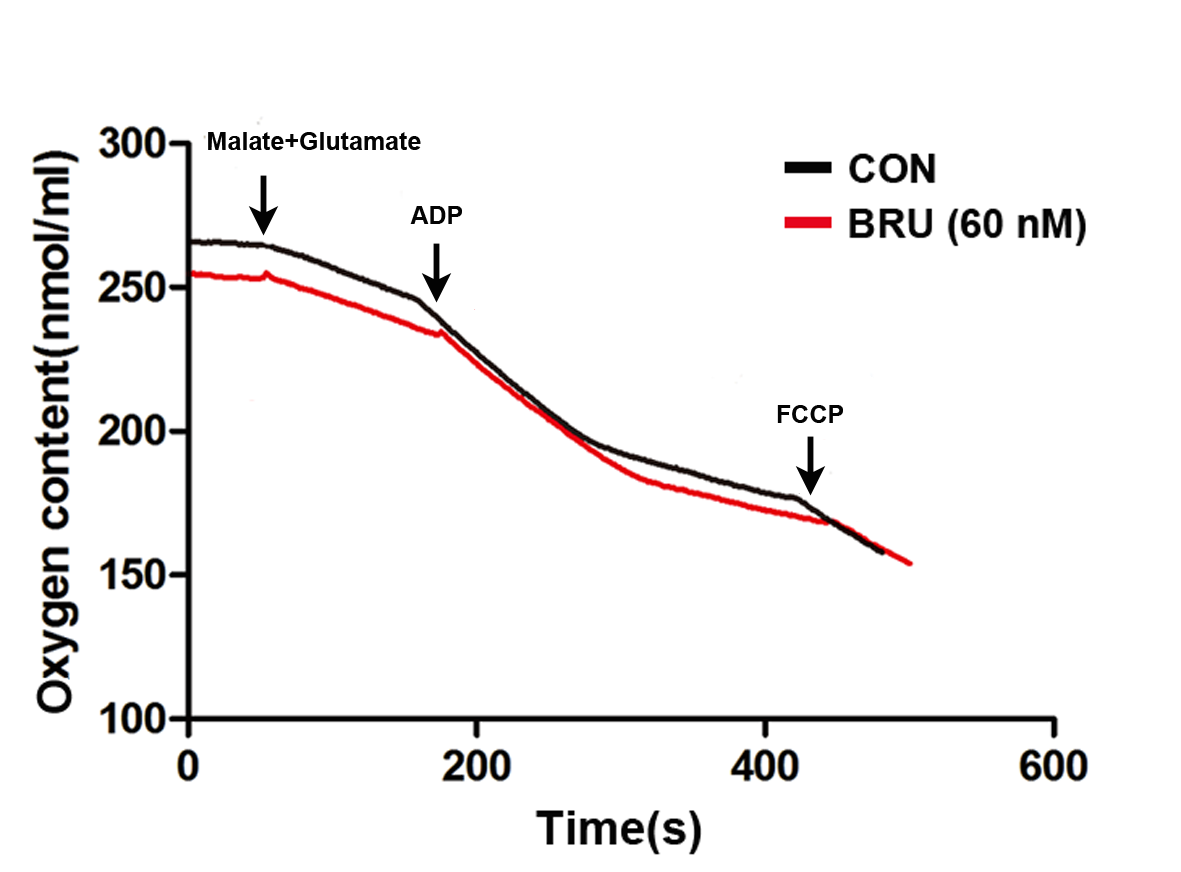


Supplementary figure 1. Effects of BRU on the respiration function in isolated rat liver mitochondria energized with malate and glutamate

Freshly isolated rat liver mitochondria were preincubated with 60 nM BRU, then oxygen consumption by mitochondrial respiration was determined. For determination of state 3 and state 4 respiration, 50 mM ADP was added where indicated. 0.5 μM FCCP was added as the positive control.
